# Supplementary material
Source: HighWire-hosted journal article supplement (https://cmaj.ca/highwire/filestream/58338/field_highwire_adjunct_files/0/case-lin-1-at.pdf)
Supplement: case-lin-1-at.pdf [file case-lin-1-at.pdf]

**Appendix 1 (as supplied by the authors): Summary of previously reported bilateral peritonsillar abscesses**

| References | Age/<br>sex | Hx of classical<br>presentation of PTA | Bilateral bulging of soft palates/<br>midline uvula | Severe complications | Dx of bilateral PTA | Initial successful<br>Tx | IV antibiotics | F/U |
|------------|-------------|----------------------------------------|-----------------------------------------------------|----------------------|---------------------|--------------------------|----------------|-----|
| 1          | 19/F        | 10-day                                 | +/+                                                 | None                 | Contrast-CT         | NA-I&D                   | antibiotics    | ET  |
| 2          | 24/F        | 6-day                                  | +/+                                                 | None                 | Contrast-CT         | QT                       | Amp/Sul        | OPD |
| 3          | 14/F        | 7-day                                  | +/+                                                 | None                 | Contrast-CT         | NA                       | Amo/Cla        | OPD |
| 4          | 30/M        | 3-day                                  | +/+                                                 | None                 | Contrast-CT         | NA                       | Cli            | NM  |
| 5          | 9/F         | 7-day                                  | +/+                                                 | None                 | Contrast-CT         | I&D                      | Cli            | ET  |
| 6          | 23/M        | 3-day                                  | +/+                                                 | None                 | Contrast-CT         | I&D                      | Cli            | OPD |
| 7          | 32/M        | 5-day                                  | +/+                                                 | None                 | NA                  | NA                       | Amo/Cla/Met    | ET  |
|            | 28/M        | 3-day                                  | Unilateral                                          | None                 | NA                  | NA                       | Amo/Cla/Met    | ET  |
| 8          | 17/F        | 14-day                                 | +/+                                                 | Sleep apnea          | I&D                 | QT                       | Pen/Met        | OPD |
| 9          | 31/M        | 4-day                                  | +/+                                                 | None                 | I&D                 | I&D                      | Amp            | ET  |

Abbreviations: Hx, history; Dx, diagnosis; Tx, treatment; F/U, follow up; CT, computed tomography; NA, needle aspiration; I&D, incision and drainage; QT, Quinsy tonsillectomy; Amp, ampicillin; Sul, sulbactam; Amo, amoxicillin; Cla, clavulanic acid; Cli, clindamycin; Met, metronidazole; Pen, penicillin; ET, Elective tonsillectomy; OPD, outpatient department; NM, no mention.

References

1. Fiechtl JF, Stack LB. Images in clinical medicine. Bilateral peritonsillar abscesses. *N Engl J Med* 2008; 358:e27.
2. Edinger JT, Hilal EY, Dastur KJ. Bilateral peritonsillar abscesses: a challenging diagnosis. *Ear Nose Throat J* 2007;86:162-3.
3. Simons JP, Branstetter BF 4th, Mandell DL. Bilateral peritonsillar abscesses: case report and literature review. *Am J Otolaryngol* 2006;27:443-5.
4. Fasano CJ, Chudnofsky C, Vanderbeek P. Bilateral peritonsillar abscesses: not your usual sore throat. *J Emerg Med* 2005;29:45-7.
5. Carstairs KL, McCaslin I. An unusual presentation of peritonsillar abscess. *Pediatr Emerg Care* 2004;20:680-2.
6. Mobley SR. Bilateral peritonsillar abscess: case report and presentation of its clinical appearance. *Ear Nose Throat J* 2001;80:381-2.
7. Safdar A, Hughes JP, Walsh RM, et al. Bilateral peritonsillar abscess revisited. *Ear Nose Throat J* 2005;84:791-3.
8. Lau SK. Sleep apnoea due to bilateral peritonsillar abscess. *J Laryngol Otol* 1987;101:617-8.
9. Kanesada K, Mogi G. Bilateral peritonsillar abscesses. *Auris Nasus Larynx* 1981;8:35-9.
